# Supplementary material for: Heat Stress Reduces Root Meristem Size via Induction of Plasmodesmal Callose Accumulation Inhibiting Phloem Unloading in Arabidopsis
Source: MDPI journal article supplement (doi:10.3390/ijms23042063), 2022-02-13
Supplement: s1 [file s1]

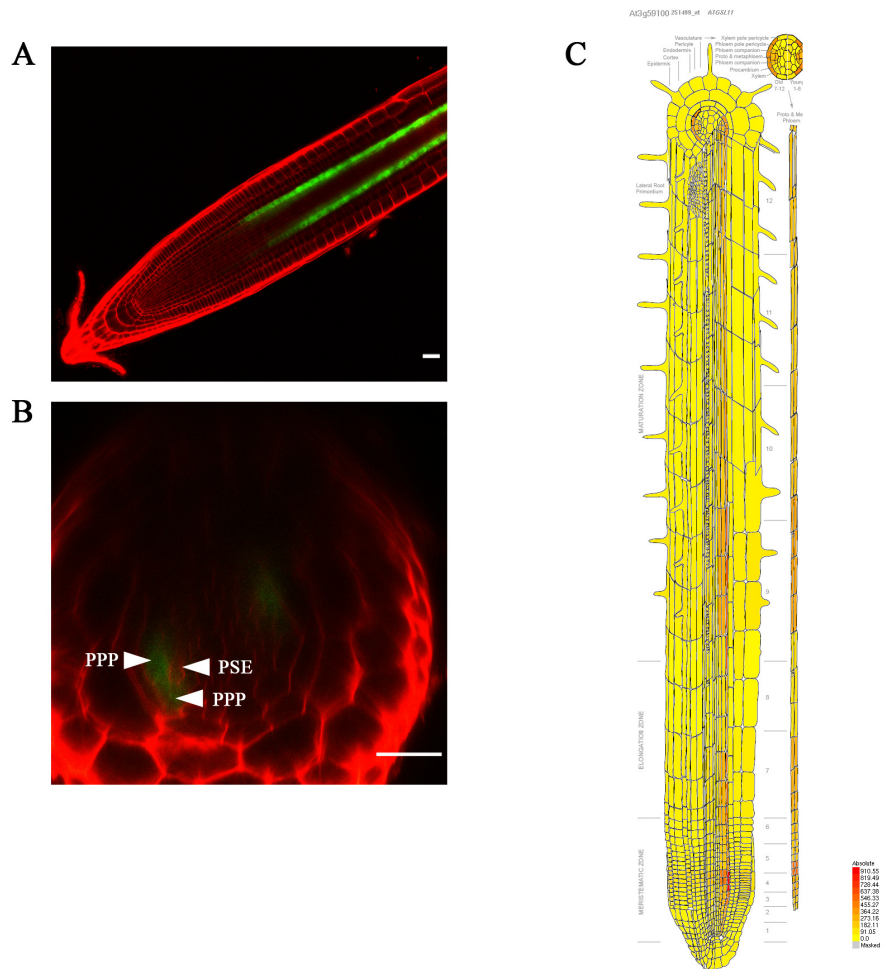

**Figure S1:** CalS8 and CalS6 expression are enrichment in the PPP cells.

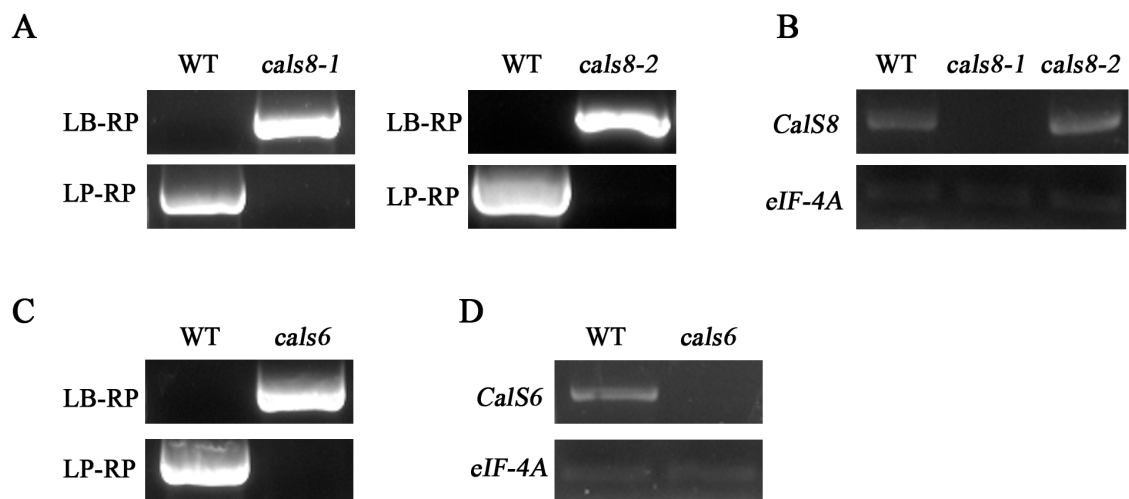

**Figure S2:** Selection and confirmation of knock-out mutations in calS8-1, calS8-2 and calS6.

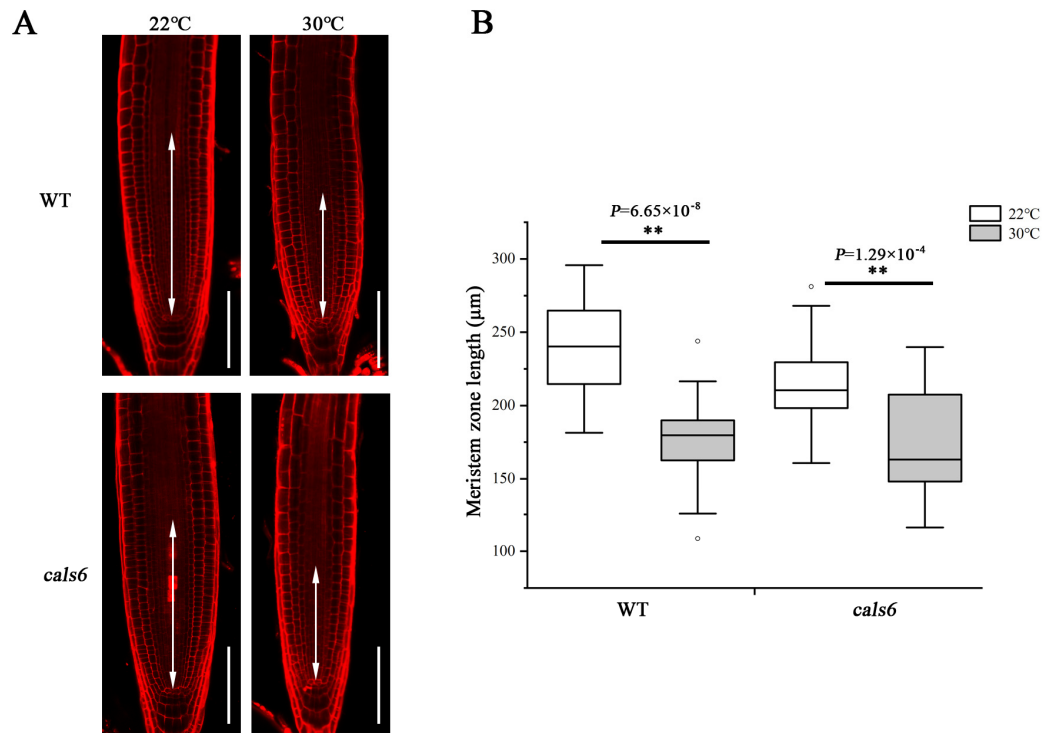

**Figure S3:** Loss of CalS6 does not rescue the meristem growth inhibition by heat stress.
